# Supplementary material
Source: PubMed Central journal article supplement (PMC4376326)
Supplement: NIHMS600449-supplement-02.pdf [file NIHMS600449-supplement-02.pdf]

# Molecular Cell Conflict of Interest Form

Cell Press, 600 Technology Square, 5<sup>th</sup> Floor, Cambridge, MA 02139

If submitting materials via EES, please upload form with your final submission.

Otherwise, please email form as a PDF attachment to [molcellproofs@cell.com](mailto:molcellproofs@cell.com).

*Molecular Cell* requires all authors to disclose any financial conflict of interest that might be construed to influence the results or interpretation of their manuscript. Authors must declare any such conflict in the Acknowledgments section of the manuscript itself. As a guideline, any affiliation associated with a payment or financial benefit exceeding \$10,000 p.a. or 5% ownership of a company or research funding by a company with related interests would constitute a conflict that must be declared. This policy applies to all submitted research manuscripts and review material. Examples of statement language include: AUTHOR is an employee and shareholder of COMPANY; AUTHOR is a founder of COMPANY and a member of its scientific advisory board; this work was supported in part by a grant from COMPANY.

Please disclose any such interest below and sign on behalf of all authors on your manuscript.

---

Please check one:

None of the authors of this work has a financial interest related to this work.

Please print the following Disclosure Statement in the Acknowledgments section:



Signature: \_\_\_\_\_ Date: \_\_\_\_\_

Manuscript Number (if applicable): \_\_\_\_\_

First Author (please print): \_\_\_\_\_
